# Supplementary material
Source: PubMed Central journal article supplement (PMC2697600)

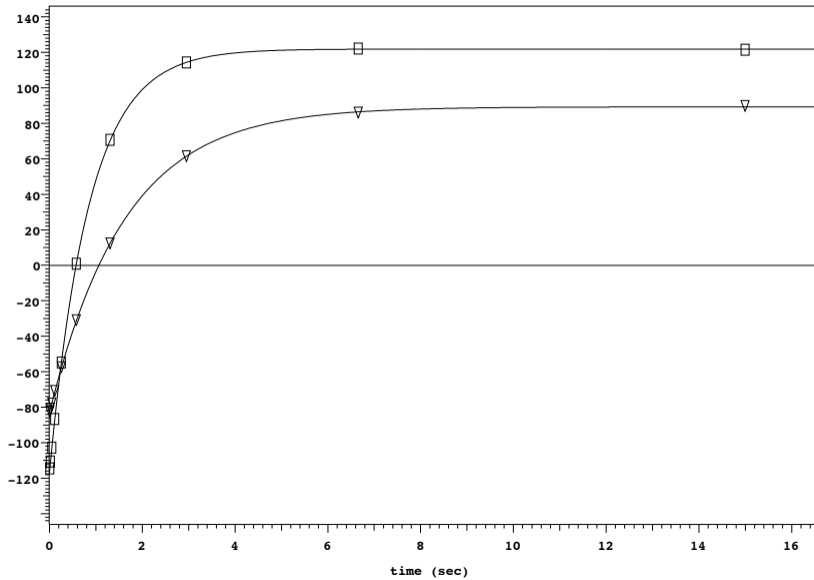

Supplement: bi9001826_si_001.pdf [file bi9001826_si_001.pdf]
